# Supplementary material for: A self-adhesive, self-healing and antibacterial hydrogel based on PVA/MXene-Ag/sucrose for fast-response, high-sensitivity and ultra-durable strain sensors
Source: Royal Society of Chemistry journal article supplement (doi:10.1039/d3nj00586k), 2023-01-01
Supplement: d3nj00586k1.pdf [file d3nj00586k1.pdf]

Supporting information

New Journal of Chemistry

**A self-adhesive, self-healing and antibacterial hydrogel based on  
PVA/MXene-Ag/sucrose for fast-response, high-sensitive and ultra-  
durable strain sensor**

Chenxing Li<sup>a,1</sup>, Ao Zheng<sup>b,1</sup>, Jiayi Zhou<sup>a</sup>, Wenwei Huang<sup>a</sup>, Yan Zhang<sup>a\*</sup>, Jingxuan Han<sup>a</sup>, Lingyan  
Cao<sup>b\*</sup>, Dongye Yang<sup>a\*</sup>

<sup>a</sup> School of Material Science and Engineering, Shanghai University of Engineering Science, Shanghai 201620, P.R. China;

<sup>b</sup> Department of Prosthodontics, Shanghai Ninth People's Hospital, Shanghai Jiao Tong University School of Medicine; College of Stomatology, Shanghai Jiao Tong University, Shanghai 200011, P.R. China.

Content

|                                                    |        |
|----------------------------------------------------|--------|
| 1. XRD and XPS.....                                | page 2 |
| 2. SEM.....                                        | page 2 |
| 3. Mechanism properties.....                       | page 2 |
| 4. Lap shear curve.....                            | page 3 |
| 5. Conductivity.....                               | page 3 |
| 6. Relative resistance changes and GF values.....  | page 4 |
| 7. Cycling stability tests of P/M-Ag hydrogel..... | page 4 |
| 8. Writing board for information encryption.....   | page 5 |
| 9. Table S1.....                                   | page 6 |

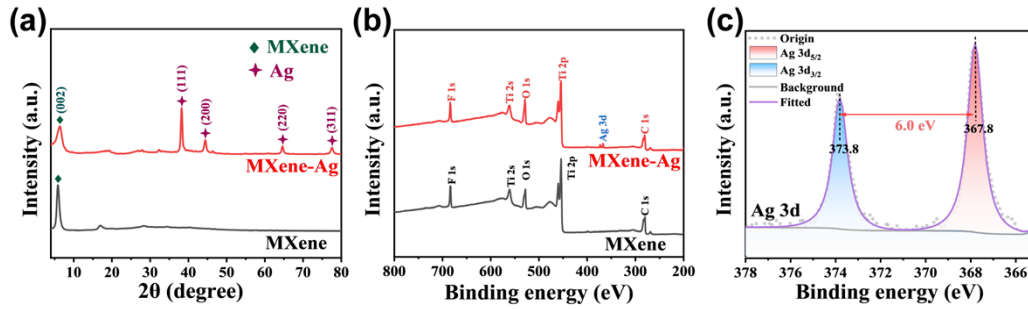

**Fig. S1.** (a) XRD patterns of MXene and MXene-Ag NPs. (b) XPS profiles of the MXene and MXene-Ag NPs. (c) Ag 3d in the MXene-Ag NPs.

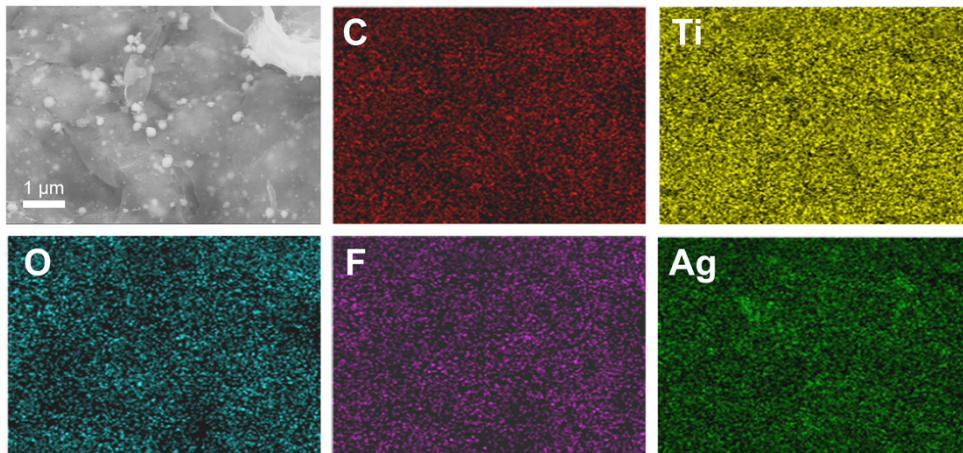

**Fig. S2.** SEM image of the MXene-AgNPs and corresponding EDS elemental mapping images for C, Ti, O, F, and Ag elements.

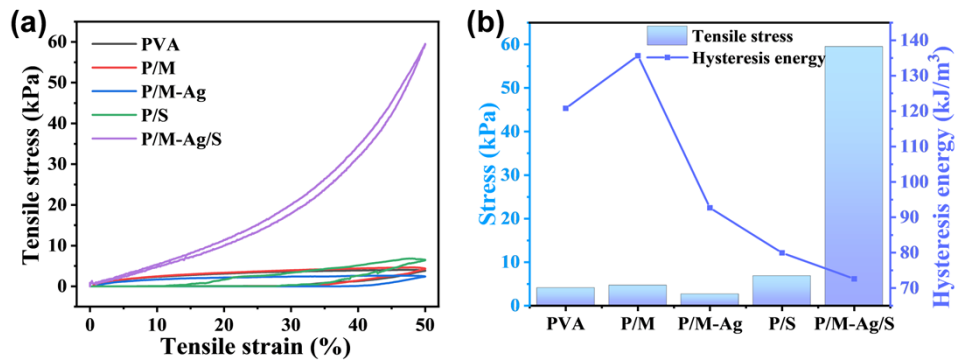

**Fig. S3.** (a) Cyclic loading-unloading curves and (b) stress and energy dissipation of PVA, P/M, P/M-Ag, P/S, and P/M-Ag/S hydrogels at a tensile strain of 50%.

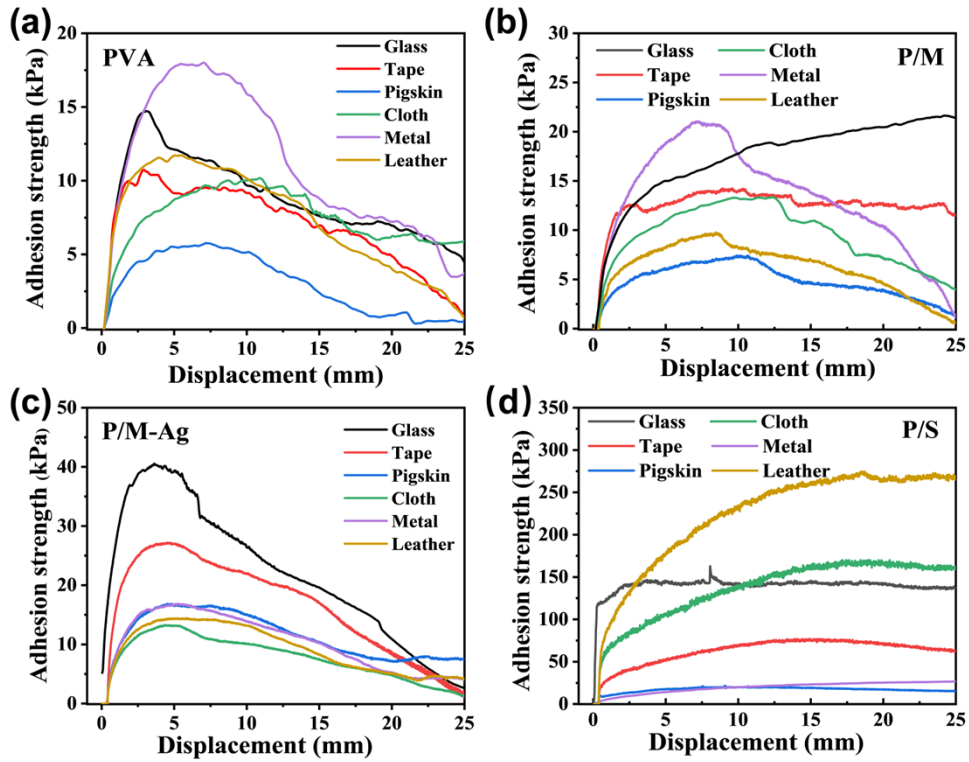

Fig. S4. (a-d) Lap shear curves for PVA, P/M, P/M-Ag, and P/S with different materials (glasses, tapes, pigskins, cloths, metals, and leathers).

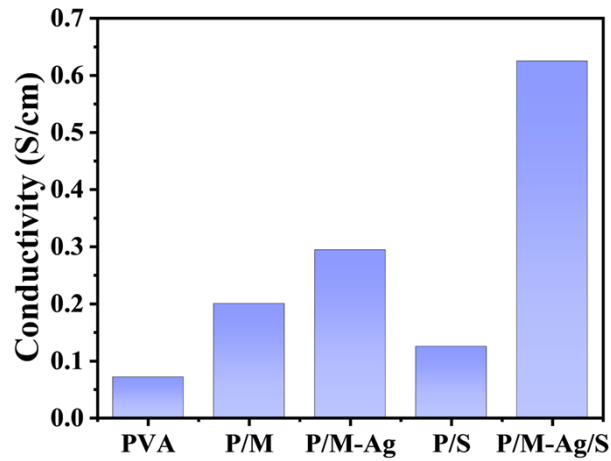

Fig. S5. Conductivity of PVA, P/M, P/M-Ag, P/S and P/M-Ag/S hydrogels.

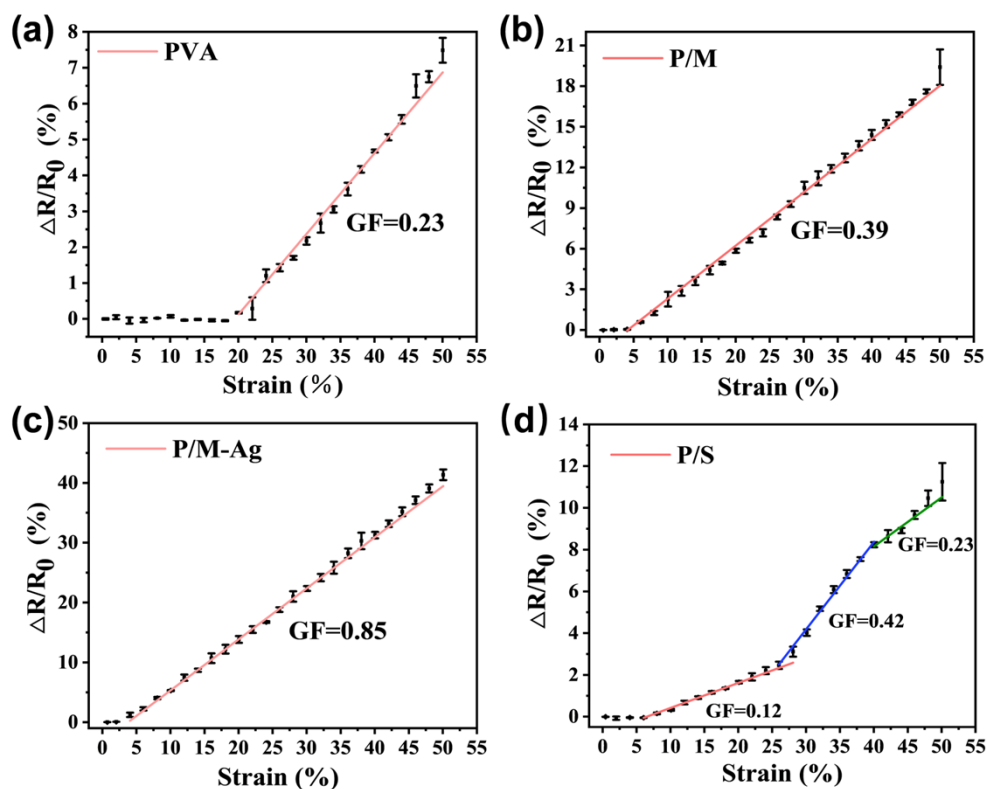

**Fig. S6.** (a-d) Relative resistance changes and GF values of PVA, P/M, P/M-Ag, and P/S hydrogel sensors of varied tensile strain (0–50%), respectively.

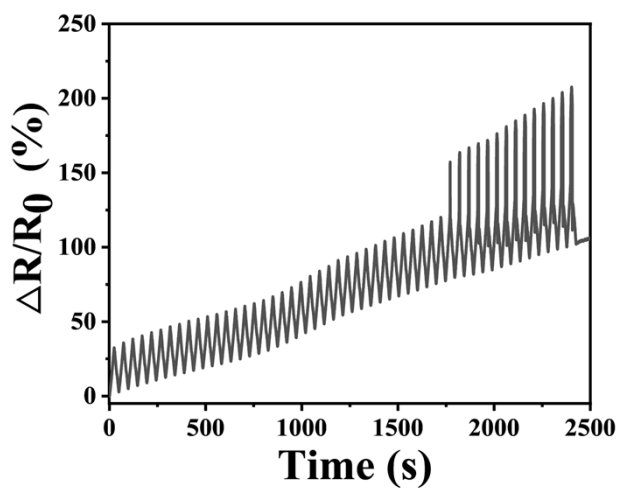

**Fig. S7.** Cycling stability tests of P/M-Ag hydrogel sensor at strain from 0% to 30% for 50 cycles.

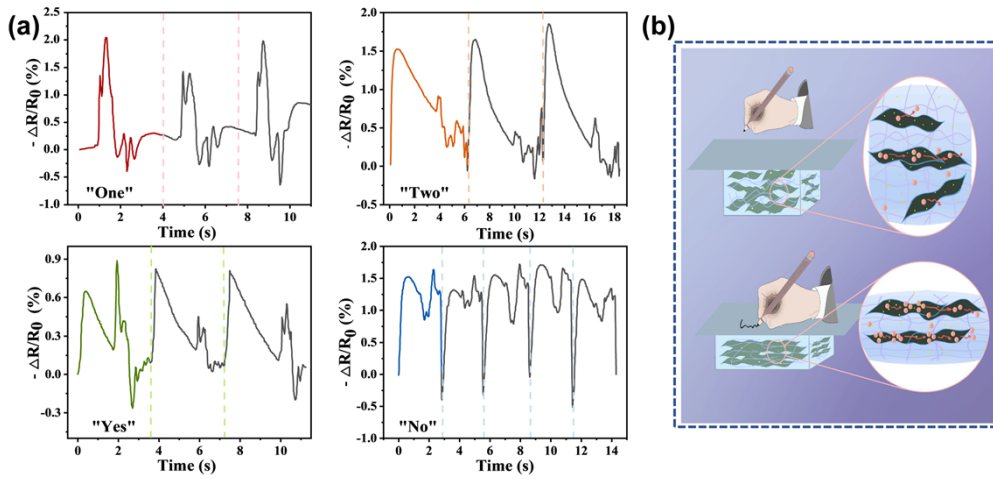

**Fig. S8.** (a) Relative resistance changes in writing different English words (“One”, “Two”, “Yes”, and “No”). (b) Schematic illustration of mechanism of writing board.

**Table S1.** Performance comparison of some conductive PVA-based hydrogels.

| <b>Materials</b>               | <b>Elongation at break (%)</b> | <b>Sensing Stability (T/C) (cycles)</b> | <b>Self-healing</b> | <b>Self-adhesive</b> | <b>Response Time (T/C) (ms)</b> | <b>Recovery Time (T/C) (ms)</b> | <b>GF (T/C)</b>    | <b>Anti-bacterial</b> | <b>Ref.</b>      |
|--------------------------------|--------------------------------|-----------------------------------------|---------------------|----------------------|---------------------------------|---------------------------------|--------------------|-----------------------|------------------|
| <b>PVA/MXene-Ag/Suc</b>        | <b>194</b>                     | <b>1500 (30%) /6000 (250 kPa)</b>       | <b>Yes</b>          | <b>Yes</b>           | <b>82.8/28.8</b>                | <b>102.6/153</b>                | <b>3.92 /-0.81</b> | <b>Yes</b>            | <b>This work</b> |
| <b>PVA/SA/MXene</b>            | 225                            | 1000 (30%) /N-G                         | N-G                 | N/G                  | 62.5/ N-G                       | 147.3 / N-G                     | 0.97 /N-G          | No                    | 1                |
| <b>PVA/MXene</b>               | 3400                           | N/G                                     | Yes                 | Yes                  | N-G                             | N-G                             | 25/80              | No                    | 2                |
| <b>PVA/MXene/CS /Gly</b>       | 16.37                          | 1000(8%) /N-G                           | N-G                 | N-G                  | 120/N-G                         | 90/N-G                          | N-G                | No                    | 3                |
| <b>PVA/SBMA /HEMA</b>          | 337                            | 1000(50 %)/ N-G                         | N-G                 | N-G                  | 130/N-G                         | 200/N-G                         | 1.43 /N-G          | No                    | 4                |
| <b>PVA/AgNWs /OPs</b>          | 1073                           | 1000(15 %) /N-G                         | Yes                 | Yes                  | 20/N-G                          | N-G                             | 1.34 /N-G          | No                    | 5                |
| <b>PVA/SNFCN</b>               | 585                            | 20(20%)/ N-G                            | Yes                 | N-G                  | 276/N-G                         | N-G                             | 0.74 /N-G          | Yes                   | 6                |
| <b>PVA/CNF</b>                 | 1919                           | 540(25%) /N-G                           | Yes                 | N-G                  | N-G                             | N-G                             | N-G /0.75          | No                    | 7                |
| <b>PVA/gelatin /PCD-Fc-CHO</b> | 1156                           | 12(30%)/ N-G                            | Yes                 | Yes                  | 512/N-G                         | 600/N-G                         | 3.42 /N-G          | No                    | 8                |
| <b>PVA/CA/AgNPs</b>            | 600                            | 200(50%) /N-G                           | N-G                 | Yes                  | 90/N-G                          | 240/N-G                         | 1.6 /N-G           | No                    | 9                |

Note: ‘N-G’ indicates ‘not given’ in the references, ‘T/C’ indicates ‘Tensile/compressive’ in the Table.

## Reference

- 1 T. Wang, J. Wang, Z. Li, M. Yue, X. Qing, P. Zhang, X. Liao, Z. Fan and S. Yang, *J Appl Polym Sci*, 2022, **139**, 51627.
- 2 Y.-Z. Zhang, K. H. Lee, D. H. Anjum, R. Sougrat, Q. Jiang, H. Kim and H. N. Alshareef, *Sci. Adv.*, 2018, **4**, eaat0098.
- 3 Z. Wang, Z. Zhou, S. Wang, X. Yao, X. Han, W. Cao and J. Pu, *Composites Part B: Engineering*, 2022, **239**, 109954.
- 4 J. Ren, Y. Liu, Z. Wang, S. Chen, Y. Ma, H. Wei and S. Lü, *Advanced Functional Materials*, 2022, **32**, 2107404.
- 5 Y. Ma, K. Liu, L. Lao, X. Li, Z. Zhang, S. Lu, Y. Li and Z. Li, *International Journal of Biological Macromolecules*, 2022, **205**, 491–499.
- 6 S. Bao, J. Gao, T. Xu, N. Li, W. Chen and W. Lu, *Chemical Engineering Journal*, 2021, **411**, 128470.
- 7 X. Jing, H. Li, H.-Y. Mi, Y.-J. Liu, P.-Y. Feng, Y.-M. Tan and L.-S. Turng, *Sensors and Actuators B: Chemical*, 2019, **295**, 159–167.
- 8 X. Fan, J. Geng, Y. Wang and H. Gu, *Polymer*, 2022, **246**, 124769.
- 9 L. Chen, X. Chang, H. Wang, J. Chen and Y. Zhu, *Nano Energy*, 2022, **96**, 107077.
